# Supplementary material
Source: Research Square preprint supplement (doi:10.21203/rs.3.rs-9644791/v1)
Supplement: Supplementary file 2 [file e8db5cb88b171dc00e8d3e4d.docx]

**Supplementary information**

Materials and Methods

Supplementary Figures. S1 to S26 and Tables S1 to S6.
